# Supplementary material for: Association of Glyburide and Subcutaneous Insulin With Perinatal Complications Among Women With Gestational Diabetes
Source: PubMed Central journal article supplement (PMC8972026; doi:10.1001/jamanetworkopen.2022.5026), 2022-03-31
Supplement: jamanetwopen-e225026-s001.pdf [file jamanetwopen-e225026-s001.pdf]

## Supplemental Online Content

Hedderson MM, Badon SE, Pimentel N, et al. Association of glyburide and subcutaneous insulin with perinatal complications among women with gestational diabetes. *JAMA Netw Open*. 2022;5(3):e225026. doi:10.1001/jamanetworkopen.2022.5026

**eTable 1.** List of Covariates Considered in the Analyses and Whether They Are Assumed to Be Associated With Outcomes or Exposure Decisions

**eTable 2.** Cutoff Values Used to Discretize Continuous Covariates

**eTable 3.** Super Learner Estimator for the Probability of Glyburide Initiation in the First 7 Days After Study Entry Given Baseline Covariates for Per-Protocol Analysis

**eTable 4.** Super Learner Estimator for the Probability of Insulin Initiation in the First 7 Days After Study Entry Given Baseline Covariates Among Patients Who Did Not Initiate Glyburide at Study Entry for Per-Protocol Analysis

**eTable 5.** Super Learner Estimator for the Probability of Continuing Glyburide After the First Follow-up Interval Given Past Covariates Among Patients Who Were Continuously Exposed to Glyburide Previously for Per-Protocol Analysis

**eTable 6.** Super Learner Estimator for the Probability of Continuing Insulin After the First Follow-up Interval Given Past Covariates Among Patients Who Were Continuously Exposed to Insulin Previously for Per-Protocol Analysis

**eTable 7.** Super Learner Estimator for the Probability of Glyburide Initiation on Index Date Given Baseline Covariates

**eTable 8.** List of Covariates With Counts and Proportions of Missing Values at Baseline

This supplemental material has been provided by the authors to give readers additional information about their work.

**eTable 1.** List of Covariates Considered in the Analyses and Whether They Are Assumed to Be Associated With Outcomes or Exposure Decisions

| Covariate                    | Outcome | Exposure | Time-dependent | Description                                                         |
|------------------------------|---------|----------|----------------|---------------------------------------------------------------------|
| Alcohol.in.Preg              | 1       | 1        | N              | Indicator variable for alcohol during pregnancy                     |
| Depression                   | 1       | 1        | Y              | Indicator variable for depression                                   |
| Depression.0                 | 1       | 1        | N              | Indicator variable for depression (baseline)                        |
| Diastolic                    | 1       | 1        | Y              | Diastolic blood pressure                                            |
| Diastolic.0                  | 1       | 1        | N              | Diastolic blood pressure (baseline)                                 |
| GA.GDM.Diagnosis             | 1       | 1        | N              | Gestational age at diagnosis of GDM (in weeks)                      |
| GA.Index                     | 1       | 1        | N              | Gestational age at index date (in weeks)                            |
| GDM.Diagnosis                | 1       | 1        | N              | GDM diagnosis from OGTT Carpenter & Coustan criteria or doctor      |
| GDM.Duration.Index           | 1       | 1        | N              | Gestational diabetes duration at index                              |
| Gestational.HTN              | 1       | 1        | Y              | Indicator variable for gestational hypertension                     |
| Gestational.HTN.0            | 1       | 1        | N              | Indicator variable for gestational hypertension (baseline)          |
| HTN.Rx                       | 1       | 1        | Y              | Indicator variable for fills of hypertension medications            |
| HTN.Rx.0                     | 1       | 1        | N              | Indicator variable for fills of hypertension medications (baseline) |
| Hypoglacemia                 | 1       | 1        | Y              | Indicator variable for hypoglycemia                                 |
| Hypoglacemia.0               | 1       | 1        | N              | Indicator variable for hypoglycemia (baseline)                      |
| Hypoglacemia.behav.1         | 1       | 1        | Y              | Indicator variable for hypoglycemia                                 |
| IllegalDrug.in.Preg          | 1       | 1        | N              | Indicator variable for illegal drugs during pregnancy               |
| Index.Year                   | 1       | 1        | N              | Year of study entry                                                 |
| Median.House.Income          | 1       | 1        | N              | Median household income                                             |
| Met.Glycemic.Control         | 1       | 1        | Y              | Indicator variable for optimal glycemic control achieved            |
| Met.Glycemic.Control.0       | 1       | 1        | N              | Indicator variable for optimal glycemic control achieved (baseline) |
| Mom.Age.Index                | 1       | 1        | N              | Maternal age at index date                                          |
| Parity                       | 1       | 1        | N              | Parity (not including the index pregnancy)                          |
| Preeclampsia                 | 1       | 1        | Y              | Indicator variable for preeclampsia                                 |
| Preeclampsia.0               | 1       | 1        | N              | Indicator variable for preeclampsia (baseline)                      |
| PreExisting.HTN              | 1       | 1        | N              | Indicator variable for pre-existing hypertension                    |
| Prepregnancy.BMI             | 1       | 1        | N              | Pre-pregnancy BMI                                                   |
| Race.Ethnicity               | 1       | 1        | N              | Maternal race/ethnicity                                             |
| Rate.of.Wt.Gain              | 1       | 1        | N              | Rate of weekly weight gain at index                                 |
| Rate.of.Wt.Gain.time.updated | 1       | 1        | Y              | Rate of weekly weight gain after index                              |
| Screening.Value              | 1       | 1        | N              | 50-g glucose Screening test result                                  |
| Severity                     | 1       | 1        | N              | Marker for GDM Screening Value $\geq$ 140                           |

|                 |   |   |   |                                                 |
|-----------------|---|---|---|-------------------------------------------------|
| Smoking.in.Preg | 1 | 1 | N | Indicator variable for smoking during pregnancy |
| Systolic        | 1 | 1 | Y | Systolic blood pressure                         |
| Systolic.0      | 1 | 1 | N | Systolic blood pressure (baseline)              |

**eTable 2.** Cutoff Values Used to Discretize Continuous Covariates

| Variable                     | Cutoffs                 |
|------------------------------|-------------------------|
| Diastolic                    | 80                      |
| Diastolic.0                  | 80                      |
| GA.GDM.Diagnosis             | 24;29                   |
| GA.Index                     | 26;33                   |
| GDM.Duration.Index           | 2;5;9                   |
| intnum                       | 1;12;13;17;21;25        |
| Median.House.Income          | 30000;50000;70000;90000 |
| Mom.Age.Index                | 30;35;40                |
| Parity                       | 0;1;2                   |
| Prepregnancy.BMI             | 18.5; 25; 30; 35        |
| Rate.of.Wt.Gain              | 0.05;.22;.31            |
| Rate.of.Wt.Gain.time.updated | 0.05;.22;.31            |
| Screening.Value              | 140;155;200             |
| Systolic                     | 120                     |
| Systolic.0                   | 120                     |

**eTable 3.** Super Learner Estimator for the Probability of Glyburide Initiation in the First 7 Days After Study Entry Given Baseline Covariates

Estimators derived based on 11321 observations from 11321 unique patients. Seven learners were considered: A logistic model (glm), splines (poly), a random forest (ranger), an xgboost (xgb), a generalized additive model (gam), a lasso model (glmnet), and a bayesian additive regression tree (bart), a logistic model with all two-way interaction terms (glm.int), a neural network regression with a single hidden layer (nnet). Screeners (i.e. feature selection denoted by 'Rank') were considered for all learner sand were defined by the top 30, 20, 10, and 5 variables most associated (i.e., with smallest p-values in a univariate regression) with the exposure (A). The weighted average (SL weights) of these 45 learners that define the super learner is based on 10-fold cross-validation (CV).

|            | glm     | glm Rank 5 | glm Rank 10 | glm Rank 20 | glm Rank 30 |
|------------|---------|------------|-------------|-------------|-------------|
| CV risk    | 0.07814 | 0.08061    | 0.07924     | 0.07876     | 0.07869     |
| SL weights | 0       | 0          | 0           | 0           | 0           |

| poly    | poly Rank 5 | poly Rank 10 | poly Rank 20 | poly Rank 30 |
|---------|-------------|--------------|--------------|--------------|
| 0.07863 | 0.07991     | 0.07908      | 0.07887      | 0.07878      |
| 0.01695 | 0           | 0            | 0            | 0            |

| rngr    | rngr Rank 5 | rngr Rank 10 | rngr Rank 20 | rngr Rank 30 |
|---------|-------------|--------------|--------------|--------------|
| 0.07906 | 0.08043     | 0.07945      | 0.07993      | 0.07973      |
| 0.1292  | 0           | 0            | 0            | 0.10792      |

| xgb     | xgb Rank 5 | xgb Rank 10 | xgb Rank 20 | xgb Rank 30 |
|---------|------------|-------------|-------------|-------------|
| 0.08449 | 0.08144    | 0.08094     | 0.0834      | 0.08355     |
| 0       | 0          | 0.0624      | 0           | 0.01412     |

| gam     | gam Rank 5 | gam Rank 10 | gam Rank 20 | gam Rank 30 |
|---------|------------|-------------|-------------|-------------|
| 0.07802 | 0.08052    | 0.07901     | 0.07838     | 0.07834     |
| 0.47769 | 0          | 0           | 0           | 0           |

| glmnet  | glmnet Rank 5 | glmnet Rank 10 | glmnet Rank 20 | glmnet Rank 30 |
|---------|---------------|----------------|----------------|----------------|
| 0.07811 | 0.08063       | 0.07926        | 0.07876        | 0.07857        |
| 0       | 0             | 0              | 0              | 0              |

| bart    | bart Rank 5 | bart Rank 10 | bart Rank 20 | bart Rank 30 |
|---------|-------------|--------------|--------------|--------------|
| 0.76667 | 0.76088     | 0.76412      | 0.76712      | 0.76665      |
| 0       | 0           | 0            | 0            | 0            |

| glm.int  | glm.int Rank 5 | glm.int Rank 10 | glm.int Rank 20 | glm.int Rank 30 |
|----------|----------------|-----------------|-----------------|-----------------|
| 0.25899  | 0.08049        | 0.0791          | 0.07989         | 0.09816         |
| 8.49e-03 | 0              | 0.03601         | 0.14722         | 0               |

| nnet    | nnet Rank 5 | nnet Rank 10 | nnet Rank 20 | nnet Rank 30 |
|---------|-------------|--------------|--------------|--------------|
| 0.09743 | 0.09743     | 0.09743      | 0.09743      | 0.09743      |
| 0       | 0           | 0            | 0            | 0            |

**eTable 4.** Super Learner Estimator for the Probability of Insulin Initiation in the First 7 Days After Study Entry Given Baseline Covariates Among Patients Who Did Not Initiate Glyburide at Study Entry Estimators derived based on 1103 observations from 1103 unique patients. Seven learners and 4 screeners were considered (see caption of Appendix Table 3 for details).

|            | glm    | glm Rank 5 | glm Rank 10 | glm Rank 20 | glm Rank 30 |
|------------|--------|------------|-------------|-------------|-------------|
| CV risk    | 0.0412 | 0.02968    | 0.03005     | 0.03127     | 0.03191     |
| SL weights | 0      | 0          | 0           | 0           | 0           |

| poly    | poly Rank 5 | poly Rank 10 | poly Rank 20 | poly Rank 30 |
|---------|-------------|--------------|--------------|--------------|
| 0.02934 | 0.02934     | 0.02935      | 0.02935      | 0.02934      |
| 0       | 0           | 0            | 0            | 0            |

| rngr    | rngr Rank 5 | rngr Rank 10 | rngr Rank 20 | rngr Rank 30 |
|---------|-------------|--------------|--------------|--------------|
| 0.02986 | 0.03016     | 0.0303       | 0.03105      | 0.03049      |
| 0       | 0           | 0.02229      | 0            | 0            |

| xgb    | xgb Rank 5 | xgb Rank 10 | xgb Rank 20 | xgb Rank 30 |
|--------|------------|-------------|-------------|-------------|
| 0.0304 | 0.0299     | 0.02984     | 0.03013     | 0.03025     |
| 0      | 0          | 0           | 0.04303     | 0           |

| gam     | gam Rank 5 | gam Rank 10 | gam Rank 20 | gam Rank 30 |
|---------|------------|-------------|-------------|-------------|
| 0.04223 | 0.02966    | 0.02997     | 0.03129     | 0.03236     |
| 0       | 0          | 0.09886     | 0.06211     | 0           |

| glmnet | glmnet Rank 5 | glmnet Rank 10 | glmnet Rank 20 | glmnet Rank 30 |
|--------|---------------|----------------|----------------|----------------|
| 0.0292 | 0.02943       | 0.02967        | 0.0301         | 0.03004        |
| 0      | 0.13188       | 0              | 0              | 0              |

| bart    | bart Rank 5 | bart Rank 10 | bart Rank 20 | bart Rank 30 |
|---------|-------------|--------------|--------------|--------------|
| 0.91148 | 0.91253     | 0.91097      | 0.91187      | 0.91343      |
| 0       | 0.15695     | 0            | 0            | 0            |

| glm.int | glm.int Rank 5 | glm.int Rank 10 | glm.int Rank 20 | glm.int Rank 30 |
|---------|----------------|-----------------|-----------------|-----------------|
| 0.49608 | 0.03161        | 0.03359         | 0.11555         | 0.22591         |
| 0       | 0              | 0               | 0               | 0               |

| nnet    | nnet Rank 5 | nnet Rank 10 | nnet Rank 20 | nnet Rank 30 |
|---------|-------------|--------------|--------------|--------------|
| 0.02992 | 0.02992     | 0.02992      | 0.02992      | 0.02992      |
| 0.48488 | 0           | 0            | 0            | 0            |



**eTable 5.** Super Learner Estimator for the Probability of Continuing Glyburide After the First Follow-up Interval Given Past Covariates Among Patients Who Were Continuously Exposed to Glyburide Previously

Estimators derived based on 83466 observations from 10042 unique patients. Seven learners and 4 screeners were considered (see caption of Appendix Table 3 for details).

|            | glm     | glm Rank 5 | glm Rank 10 | glm Rank 20 | glm Rank 30 |
|------------|---------|------------|-------------|-------------|-------------|
| CV risk    | 0.01559 | 0.01566    | 0.01564     | 0.01563     | 0.01563     |
| SL weights | 0       | 0          | 0           | 0           | 0           |

| poly    | poly Rank 5 | poly Rank 10 | poly Rank 20 | poly Rank 30 |
|---------|-------------|--------------|--------------|--------------|
| 0.01541 | 0.01541     | 0.01545      | 0.01546      | 0.01546      |
| 0.0564  | 0           | 0            | 0            | 0            |

| rngr    | rngr Rank 5 | rngr Rank 10 | rngr Rank 20 | rngr Rank 30 |
|---------|-------------|--------------|--------------|--------------|
| 0.0151  | 0.01541     | 0.01543      | 0.01527      | 0.01535      |
| 0.20883 | 0           | 0            | 0.07018      | 0.09879      |

| xgb     | xgb Rank 5 | xgb Rank 10 | xgb Rank 20 | xgb Rank 30 |
|---------|------------|-------------|-------------|-------------|
| 0.01551 | 0.01537    | 0.01582     | 0.0155      | 0.01558     |
| 0.25095 | 0.05134    | 0           | 0.06975     | 0.03662     |

| gam     | gam Rank 5 | gam Rank 10 | gam Rank 20 | gam Rank 30 |
|---------|------------|-------------|-------------|-------------|
| 0.01558 | 0.01566    | 0.01564     | 0.01563     | 0.01563     |
| 0       | 0          | 0           | 0           | 0           |

| glmnet  | glmnet Rank 5 | glmnet Rank 10 | glmnet Rank 20 | glmnet Rank 30 |
|---------|---------------|----------------|----------------|----------------|
| 0.01558 | 0.01567       | 0.01565        | 0.01563        | 0.01563        |
| 0       | 0             | 0              | 0              | 0              |

| bart    | bart Rank 5 | bart Rank 10 | bart Rank 20 | bart Rank 30 |
|---------|-------------|--------------|--------------|--------------|
| 0.95494 | 0.95387     | 0.95385      | 0.95552      | 0.95546      |
| 0       | 0           | 0.13971      | 0            | 0            |

| glm.int | glm.int Rank 5 | glm.int Rank 10 | glm.int Rank 20 | glm.int Rank 30 |
|---------|----------------|-----------------|-----------------|-----------------|
| 0.32922 | 0.01539        | 0.01534         | 0.01554         | 0.11825         |
| 4.5e-04 | 0              | 0               | 0.01411         | 1.66e-03        |

| nnet     | nnet Rank 5 | nnet Rank 10 | nnet Rank 20 | nnet Rank 30 |
|----------|-------------|--------------|--------------|--------------|
| 0.01645  | 0.01645     | 0.01645      | 0.01645      | 0.01645      |
| 1.22e-03 | 0           | 0            | 0            | 0            |

**eTable 6.** Super Learner Estimator for the Probability of Continuing Insulin After the First Follow-up Interval Given Past Covariates Among Patients Who Were Continuously Exposed to Insulin Previously

Estimators derived based on 8311 observations from 1041 unique patients. Seven learners and 4 screeners were considered (see caption of Appendix Table 3 for details).

|            | glm     | glm Rank 5 | glm Rank 10 | glm Rank 20 | glm Rank 30 |
|------------|---------|------------|-------------|-------------|-------------|
| CV risk    | 0.04203 | 0.04166    | 0.04156     | 0.04158     | 0.04171     |
| SL weights | 0       | 0          | 0           | 0           | 0           |

| poly    | poly Rank 5 | poly Rank 10 | poly Rank 20 | poly Rank 30 |
|---------|-------------|--------------|--------------|--------------|
| 0.03528 | 0.03536     | 0.03526      | 0.03533      | 0.03536      |
| 0.34827 | 0           | 0.22101      | 0            | 0            |

| rngr    | rngr Rank 5 | rngr Rank 10 | rngr Rank 20 | rngr Rank 30 |
|---------|-------------|--------------|--------------|--------------|
| 0.03987 | 0.03584     | 0.03644      | 0.03749      | 0.03859      |
| 0       | 0.03734     | 0            | 0.05356      | 0            |

| xgb     | xgb Rank 5 | xgb Rank 10 | xgb Rank 20 | xgb Rank 30 |
|---------|------------|-------------|-------------|-------------|
| 0.04337 | 0.03594    | 0.03745     | 0.03917     | 0.04146     |
| 0.07854 | 0.1261     | 0           | 0.12776     | 0           |

| gam     | gam Rank 5 | gam Rank 10 | gam Rank 20 | gam Rank 30 |
|---------|------------|-------------|-------------|-------------|
| 0.04166 | 0.04138    | 0.04127     | 0.0413      | 0.04139     |
| 0       | 0          | 0           | 0           | 0           |

| glmnet  | glmnet Rank 5 | glmnet Rank 10 | glmnet Rank 20 | glmnet Rank 30 |
|---------|---------------|----------------|----------------|----------------|
| 0.04138 | 0.04165       | 0.04152        | 0.04148        | 0.04148        |
| 0       | 0             | 0              | 0              | 0              |

| bart    | bart Rank 5 | bart Rank 10 | bart Rank 20 | bart Rank 30 |
|---------|-------------|--------------|--------------|--------------|
| 0.88687 | 0.89308     | 0.89206      | 0.89243      | 0.89189      |
| 0       | 0           | 0            | 0            | 0            |

| glm.int | glm.int Rank 5 | glm.int Rank 10 | glm.int Rank 20 | glm.int Rank 30 |
|---------|----------------|-----------------|-----------------|-----------------|
| 0.5015  | 0.04193        | 0.04304         | 0.05007         | 0.18032         |
| 0       | 0              | 0               | 7.42e-03        | 0               |

| nnet    | nnet Rank 5 | nnet Rank 10 | nnet Rank 20 | nnet Rank 30 |
|---------|-------------|--------------|--------------|--------------|
| 0.04368 | 0.04368     | 0.04368      | 0.04368      | 0.04368      |
| 0       | 0           | 0            | 0            | 0            |

**eTable 7.** Super Learner Estimator for the Probability of Glyburide Initiation on Index Date Given Baseline Covariates

Estimators derived based on 11321 observations from 11321 unique patients. Seven learners and 4 screeners were considered (see caption of Appendix Table 3 for details).

|            | glm     | glm Rank 5 | glm Rank 10 | glm Rank 20 | glm Rank 30 |
|------------|---------|------------|-------------|-------------|-------------|
| CV risk    | 0.07604 | 0.07853    | 0.07713     | 0.07685     | 0.07658     |
| SL weights | 0       | 0          | 0           | 0           | 0           |

| poly    | poly Rank 5 | poly Rank 10 | poly Rank 20 | poly Rank 30 |
|---------|-------------|--------------|--------------|--------------|
| 0.07639 | 0.07782     | 0.07692      | 0.07685      | 0.07661      |
| 0.07399 | 0           | 0            | 0            | 0            |

| rngr    | rngr Rank 5 | rngr Rank 10 | rngr Rank 20 | rngr Rank 30 |
|---------|-------------|--------------|--------------|--------------|
| 0.07702 | 0.07838     | 0.07734      | 0.07823      | 0.07781      |
| 0.18527 | 0           | 0            | 0            | 1.17e-03     |

| xgb      | xgb Rank 5 | xgb Rank 10 | xgb Rank 20 | xgb Rank 30 |
|----------|------------|-------------|-------------|-------------|
| 0.08216  | 0.0793     | 0.07866     | 0.08131     | 0.08211     |
| 3.86e-03 | 0          | 0.09829     | 2.5e-03     | 0           |

| gam     | gam Rank 5 | gam Rank 10 | gam Rank 20 | gam Rank 30 |
|---------|------------|-------------|-------------|-------------|
| 0.07595 | 0.07845    | 0.07693     | 0.07649     | 0.07625     |
| 0.45177 | 0          | 0           | 0           | 0           |

| glmnet  | glmnet Rank 5 | glmnet Rank 10 | glmnet Rank 20 | glmnet Rank 30 |
|---------|---------------|----------------|----------------|----------------|
| 0.07595 | 0.07855       | 0.07716        | 0.07688        | 0.07653        |
| 0       | 0             | 0              | 0              | 0              |

| bart    | bart Rank 5 | bart Rank 10 | bart Rank 20 | bart Rank 30 |
|---------|-------------|--------------|--------------|--------------|
| 0.77292 | 0.76711     | 0.77049      | 0.77277      | 0.77258      |
| 0       | 0           | 0            | 0            | 0            |

| glm.int  | glm.int Rank 5 | glm.int Rank 10 | glm.int Rank 20 | glm.int Rank 30 |
|----------|----------------|-----------------|-----------------|-----------------|
| 0.26349  | 0.07842        | 0.07703         | 0.07797         | 0.11557         |
| 4.34e-03 | 0              | 0               | 0.15631         | 0.02249         |

| nnet    | nnet Rank 5 | nnet Rank 10 | nnet Rank 20 | nnet Rank 30 |
|---------|-------------|--------------|--------------|--------------|
| 0.09469 | 0.09469     | 0.09469      | 0.09469      | 0.09469      |
| 0       | 0           | 0            | 0            | 0            |

**eTable 8 .** List of Covariates With Counts and Proportions of Missing Values at Baseline

| Covariate              | N Missing values | % Missing values |
|------------------------|------------------|------------------|
| Depression.0           | 0                | 0.0%             |
| Diastolic.0            | 192              | 1.7%             |
| Gestational.HTN.0      | 0                | 0.0%             |
| HTN.Rx.0               | 0                | 0.0%             |
| Hypoglycemia.0         | 0                | 0.0%             |
| Median.House.Income    | 93               | 0.8%             |
| Met.Glycemic.Control.0 | 1031             | 9.1%             |
| Mom.Age.Index          | 0                | 0.0%             |
| Parity                 | 160              | 1.4%             |
| Preeclampsia.0         | 0                | 0.0%             |
| PreExisting.HTN        | 0                | 0.0%             |
| Prepregnancy.BMI       | 654              | 5.8%             |
| Race.Ethnicity         | 20               | 0.2%             |
| Rate.of.Wt.Gain        | 940              | 8.3%             |
| Severity               | 971              | 8.6%             |
| Systolic.0             | 192              | 1.7%             |
